# Supplementary material for: Utilization of sodium pyrophosphate labelled with /sup 99m/Tc in skeleton scintiscanning.
Source: Royal Society of Chemistry journal article supplement (doi:10.1039/d1ra07742b), 1972-01-01
Supplement: d1ra07742b1.pdf [file d1ra07742b1.pdf]

## Efficient purification of wastewater by applying mechanical force and BaCO<sub>3</sub>/TiO<sub>2</sub> and BaTiO<sub>3</sub>/TiO<sub>2</sub> Piezocatalysts

Omid Amiri <sup>a</sup>\*, Haval Aziz Ahmed <sup>a</sup>, Abdulla Ahmed Abdan <sup>a</sup>, Peshawa H. Mahmood <sup>a</sup>, Masoud Salavati-Niasari<sup>b\*\*</sup>

<sup>a</sup> Department of Chemistry, College of Science, University of Raparin, Rania, Kurdistan Region, Iraq

<sup>b</sup>Institute of Nano Science and Nano Technology, University of Kashan, Kashan, P. O. Box. 87317-51167, I. R. Iran

\* Corresponding author. Tel: +9647700581175; E-mail address: [oamiri@uor.edu.krd](mailto:oamiri@uor.edu.krd) (O. Amiri)

\*\* Corresponding authors: E-mail address: [salavati@kashanu.ac.ir](mailto:salavati@kashanu.ac.ir) (Prof. M. Salavati-Niasari)  
Tel.: +98 31 55912383; Fax: +98 31 55913201

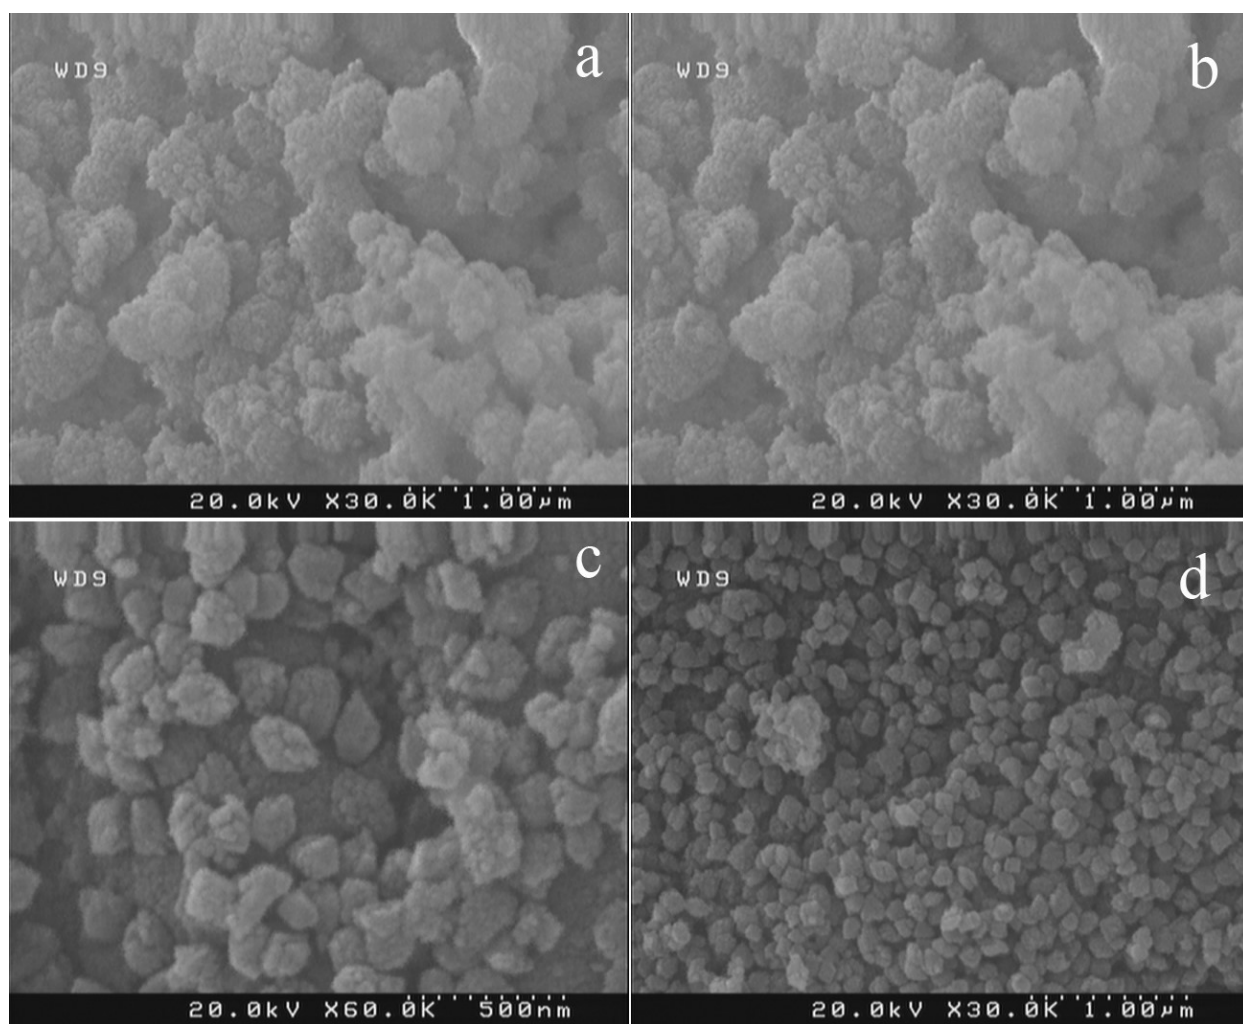

**Fig. S1.** SEM images for sample prepared at 140 °C (a, b) and 180 °C (c, d).

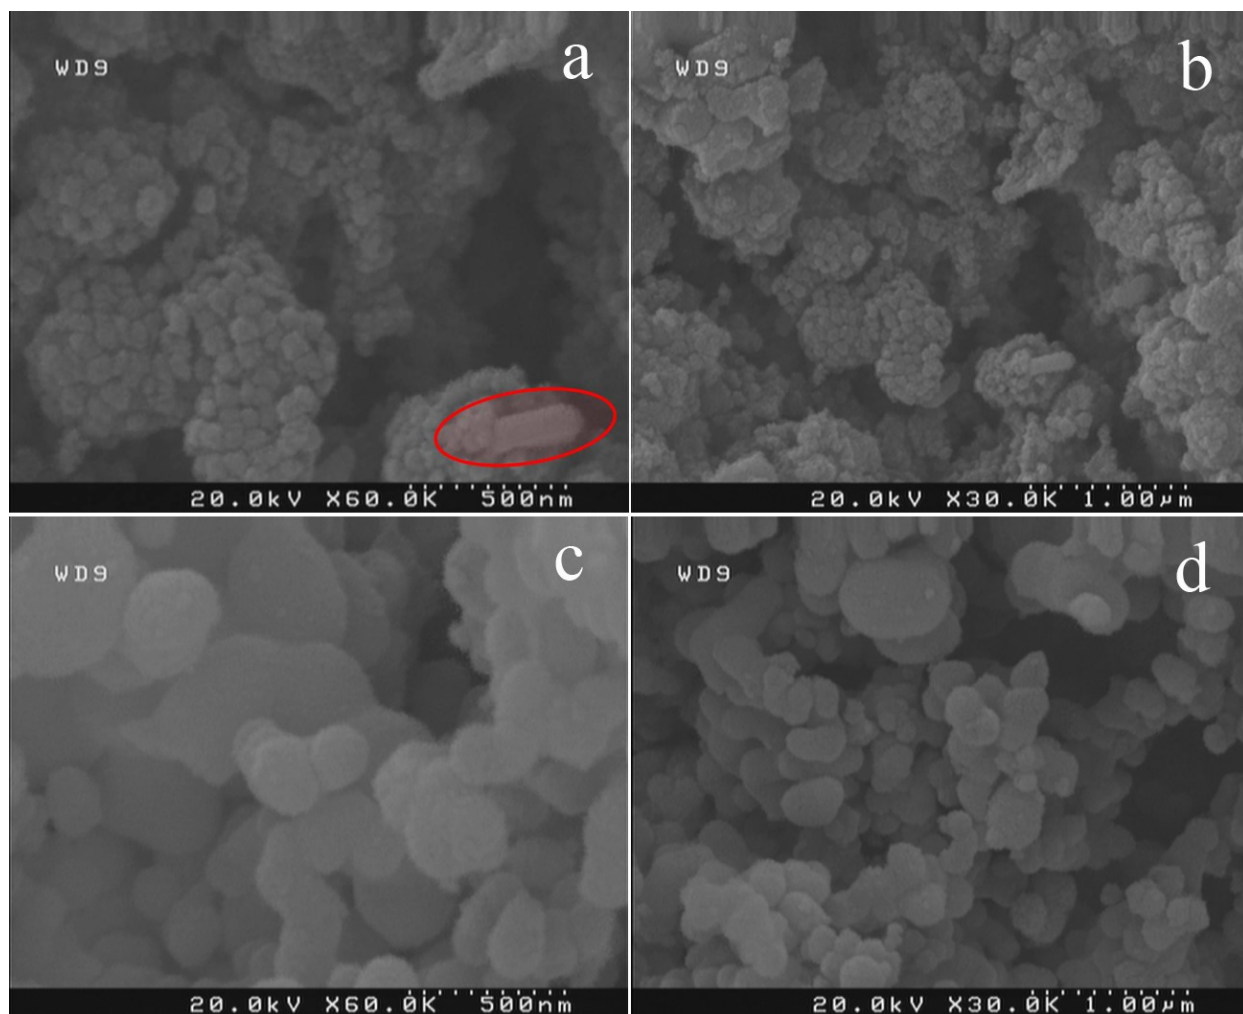

**Fig. S2.** Effect of reaction time on the morphology of final products: a, b) 4 h and c, d) 8 h.

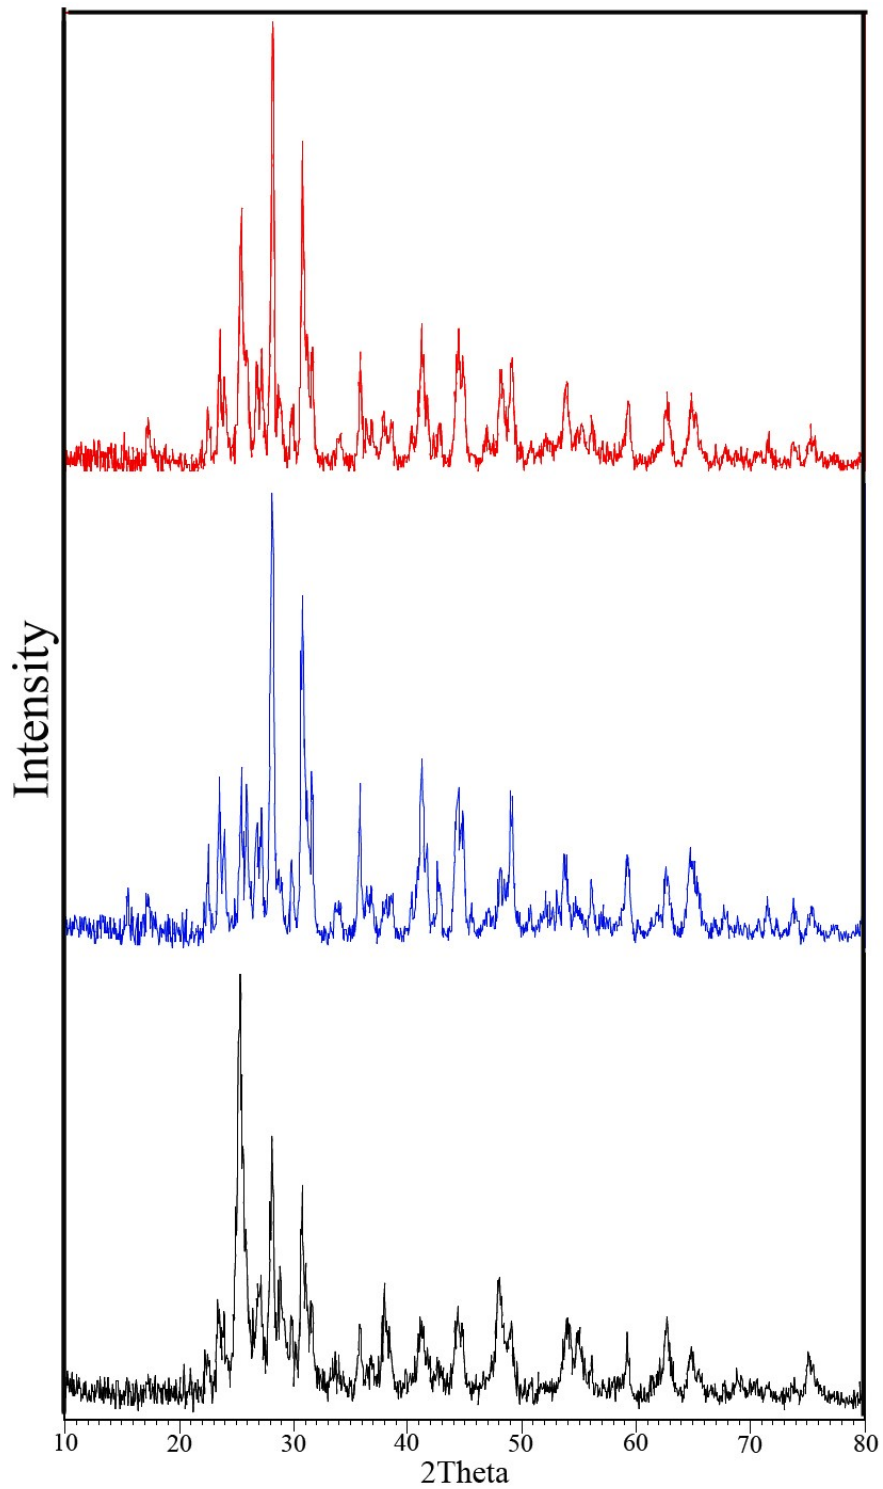

**Fig. S3.** XRD pattern of sample 1 (a), sample 2 (b), and sample 3 (c) after calcination at 750 °C for 2h.

**Table 1.** Experimental detail for preparing a typical piezocatalyst.

| <b>Sample Number</b> | <b>Reaction Time (h)</b> | <b>Reaction Temperature (°C)</b> | <b>Surfactant</b> |
|----------------------|--------------------------|----------------------------------|-------------------|
| 1                    | 6                        | 160                              | -----             |
| 2                    | 6                        | 160                              | plum              |
| 3                    | 6                        | 160                              | apricot           |
| 4                    | 6                        | 160                              | peach             |
| 5                    | 6                        | 160                              | melon             |
| 6                    | 6                        | 140                              | -----             |
| 7                    | 6                        | 180                              | -----             |
| 8                    | 4                        | 160                              | -----             |
| 9                    | 8                        | 160                              | -----             |

Table S2. Effect of reaction temperature during synthesis of catalyst on the degradation efficiency of AR151.

| Catalyst | Vibration Time<br>(h) | Vibration Power<br>(W) | Pollutant | Degradation<br>Efficiency (%) |
|----------|-----------------------|------------------------|-----------|-------------------------------|
| T1       | 2                     | 100                    | AR151     | 95.4                          |
| T2       | 2                     | 100                    | AR151     | 78.4                          |
| T3       | 2                     | 100                    | AR151     | 96.7                          |
